# Supplementary material
Source: Royal Society of Chemistry journal article supplement (doi:10.1039/d6tc00361c)
Supplement: d6tc00361c1.pdf [file d6tc00361c1.pdf]

## Supporting Information

### **Comparative study of high-k Metal Oxide-PVP/PMMA hybrid Gate Dielectrics for low-temperature, all-solution-processed flexible In<sub>2</sub>O<sub>3</sub> thin film transistors**

J. Meza Arroyo<sup>a\*</sup>, M.G. Syamala Rao<sup>a</sup>, V.H. Martínez-Landeros<sup>b</sup>, O. Cortázar<sup>a</sup>,  
Julia W. P. Hsu<sup>c</sup>, R. Ramírez-Bon<sup>a\*</sup>

<sup>a</sup> Centro de Investigación y de Estudios Avanzados del IPN, Unidad Querétaro, Apdo, Postal 1-798,  
76001 Querétaro, Querétaro, México.

<sup>b</sup> Facultad de Metalurgia, Universidad Autónoma de Coahuila, Carr. 57, km. 5, C.P.25720,  
Monclova, Coahuila, México

<sup>c</sup> Department of Materials Science and Engineering, The University of Texas at Dallas, 800 West  
Campbell Road, Richardson, Texas 75080, United States

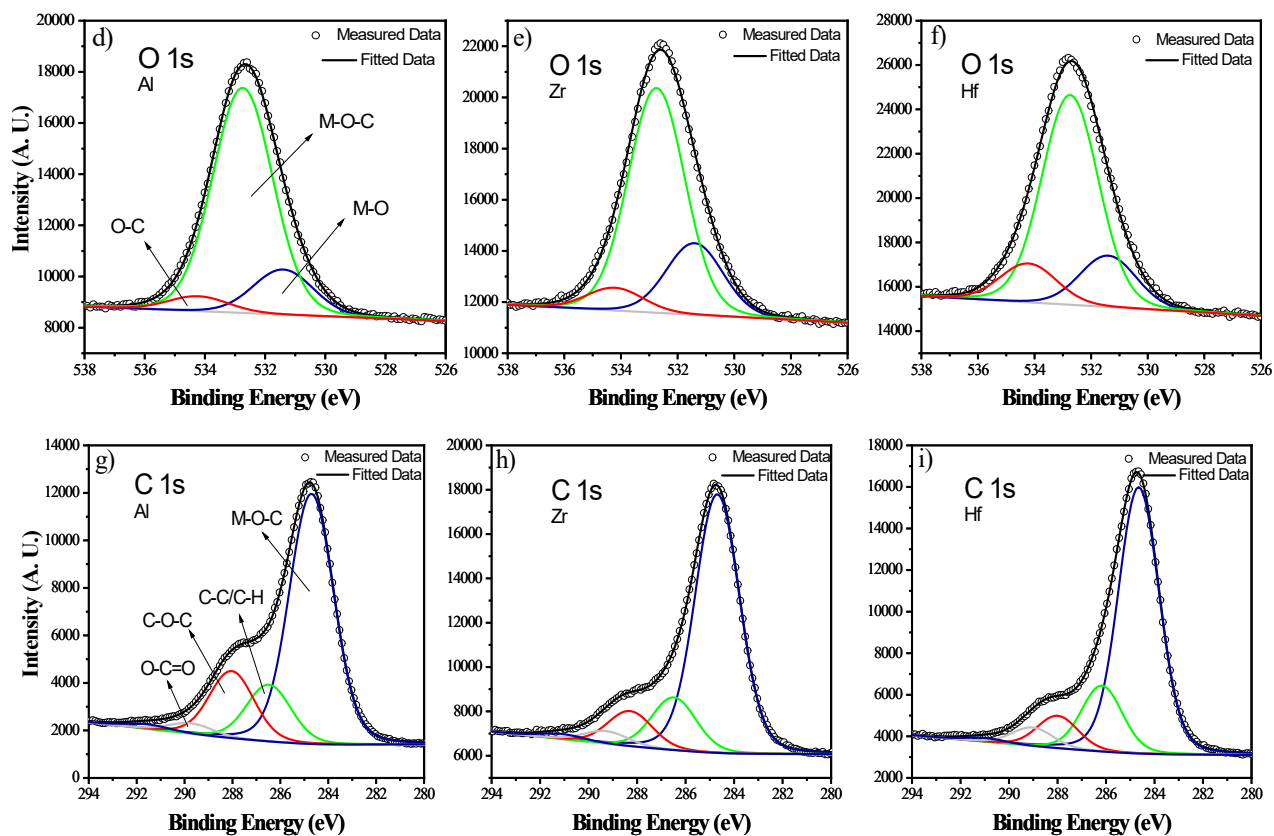

Fig. S1. High resolution XPS spectra of O 1s for d) AlO<sub>x</sub>, e) ZrO<sub>x</sub>, and f) HfO<sub>x</sub>-based hybrid dielectrics, and C 1s for g) AlO<sub>x</sub>, h) ZrO<sub>x</sub>, and i) HfO<sub>x</sub>-based hybrid dielectrics.

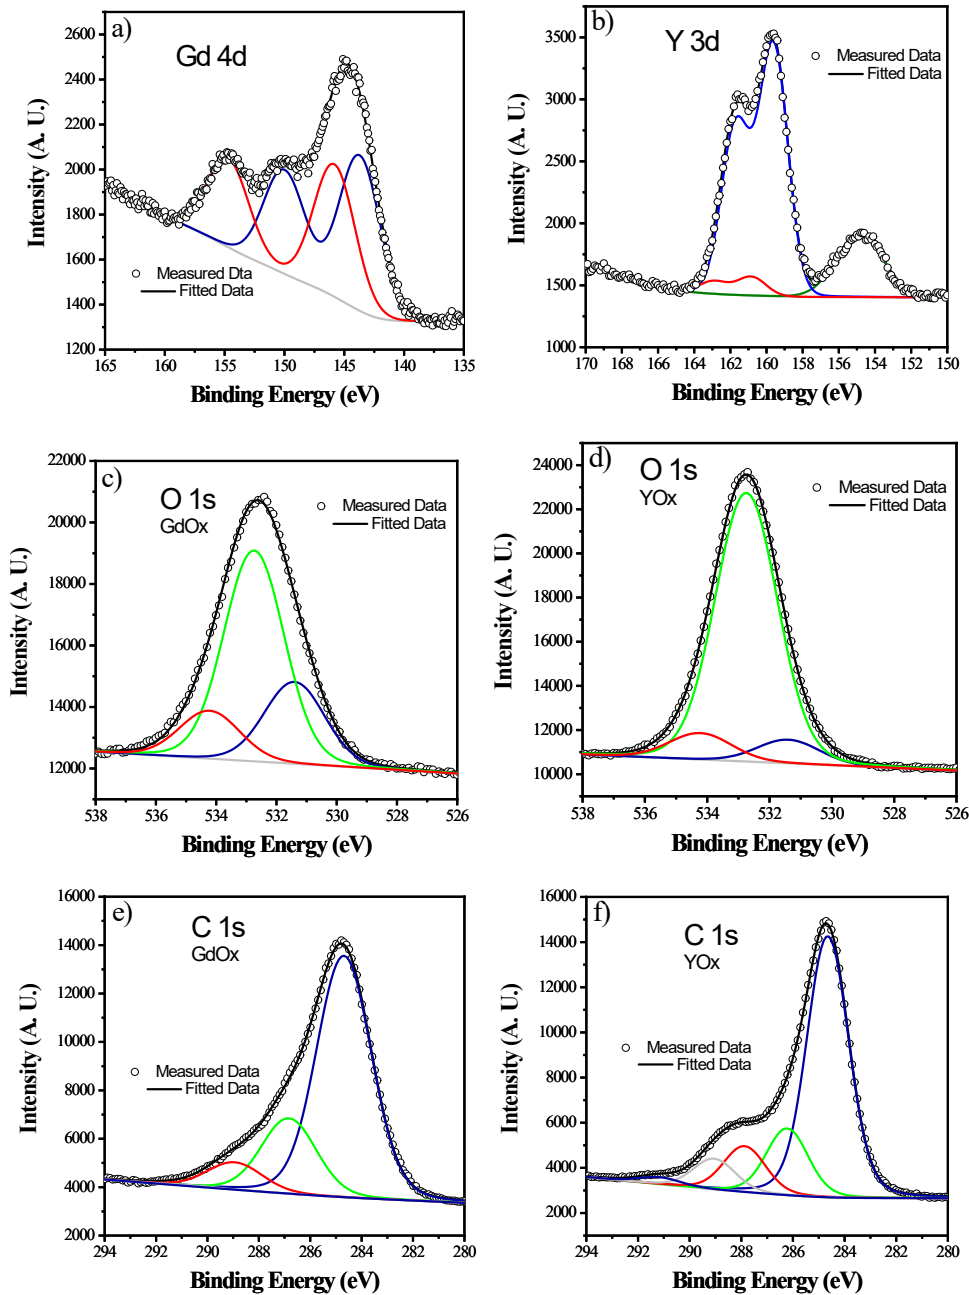

Fig. S2. High resolution XPS spectra of a) Gd 4d, b) Y 3d, O 1s for c) GdOx, and d) YOx-based hybrid dielectrics, and C 1s for e) GdOx, and f) YOx-based hybrid dielectrics.

Table S1 Parameters used for the XPS peak-fitting procedure.

| Peak           | Fitting parameters  |          |            | Atomic Percentage (%) |       |       |       |       |       |
|----------------|---------------------|----------|------------|-----------------------|-------|-------|-------|-------|-------|
|                | Binding Energy (eV) | Gaussian | Lorentzian | PMMA                  | Gd    | Zr    | Hf    | Y     | Al    |
| C <sub>1</sub> | 284.68              | 1.97     | 0.35       | 66.42                 | 50.36 | 48.10 | 47.40 | 39.23 | 40.75 |
| C <sub>2</sub> | 286.47              | 1.97     | 0.35       | 9.49                  | 15.67 | 9.74  | 11.67 | 9.99  | 9.18  |
| C <sub>3</sub> | 288.02              | 1.97     | 0.35       | --                    | 5.72  | 6.57  | 5.80  | 6.91  | 10.93 |

|                |        |      |      |    |      |      |      |      |      |
|----------------|--------|------|------|----|------|------|------|------|------|
| C <sub>4</sub> | 289.73 | 1.97 | 0.35 | -- | 0.22 | 2.35 | 3.30 | 4.60 | 1.68 |
| C <sub>5</sub> | 291.53 | 1.97 | 0.35 | -- | --   | 0.98 | 0.65 | 1.04 | 0.80 |

| <i>Fitting parameters</i> |                            |                 |                   | <i>Atomic Percentage (%)</i> |           |           |           |          |           |
|---------------------------|----------------------------|-----------------|-------------------|------------------------------|-----------|-----------|-----------|----------|-----------|
| <i>Peak</i>               | <i>Binding Energy (eV)</i> | <i>Gaussian</i> | <i>Lorentzian</i> | <i>PMMA</i>                  | <i>Gd</i> | <i>Zr</i> | <i>Hf</i> | <i>Y</i> | <i>Al</i> |
| O <sub>1</sub>            | 531.35                     | 2.18            | 0.25              | 3.23                         | 4.35      | 4.44      | 3.56      | 1.59     | 2.61      |
| O <sub>2</sub>            | 532.73                     | 2.18            | 0.25              | 8.92                         | 11.71     | 14.39     | 15.02     | 18.17    | 13.30     |
| O <sub>3</sub>            | 34.25                      | 2.18            | 0.25              | 1.60                         | 2.54      | 1.40      | 2.69      | 1.77     | 0.86      |

| <i>Core</i> | <i>Peak</i>     | <i>Branch</i> | <i>Binding Energy (eV)</i> | <i>Spin-orbit Splitting</i> | <i>Gaussian</i> | <i>Lorentzian</i> | <i>Atomic Percentage (%)</i> |
|-------------|-----------------|---------------|----------------------------|-----------------------------|-----------------|-------------------|------------------------------|
| Gd 4d       | Gd <sub>1</sub> | 5/2           | 143.69                     | 6.29                        | 3.92            | 0                 | 0.65                         |
|             |                 | 3/2           | 149.98□                    |                             | 3.92            | 0                 |                              |
|             | Gd <sub>2</sub> | 5/2           | 145.79                     | 8.86                        | 3.92            | 0                 | 0.56                         |
|             |                 | 5/2           | 154.65□                    |                             | 3.92            | 0                 |                              |
| Zr 3d       | Zr <sub>1</sub> | 5/2           | 183.92                     | 2.4                         | 1.62            | 0.38              | 3.14                         |
|             |                 | 3/2           | 186.32                     |                             | 1.62            | 0.38              |                              |
|             | Zr <sub>2</sub> | 5/2           | 185.44                     | 2.4                         | 1.62            | 0.02              | 0.24                         |
|             |                 | 3/2           | 187.84                     |                             | 1.62            | 0.02              |                              |
| Hf 4f       | Hf <sub>1</sub> | 7/2           | 19.38                      | 1.66                        | 1.89            | 0.13              | 0.19                         |
|             |                 | 5/2           | 21.04                      |                             | 1.89            | 0.13              |                              |
|             | Hf <sub>2</sub> | 7/2           | 21.93                      | 1.66                        | 1.89            | 0.13              | 3.92                         |
|             |                 | 5/2           | 23.59                      |                             | 1.89            | 0.13              |                              |
| Y 3d        | Y <sub>1</sub>  | 5/2           | 159.59                     | 2.09                        | 1.79            | 0.047             | 3.08                         |
|             |                 | 3/2           | 161.68                     |                             | 1.79            | 0.047             |                              |
|             | Y <sub>2</sub>  | 5/2           | 160.84                     | 2.09                        | 1.79            | 0.047             | 0.22                         |
|             |                 | 3/2           | 162.93□                    |                             | 1.79            | 0.047             |                              |
| Al 2p       | Al <sub>1</sub> | 3/2           | 75.87                      | 0.44                        | 2.48            | 0.085             | 2.37                         |
|             |                 | 1/2           | 76.31                      |                             | 2.48            | 0.085             |                              |

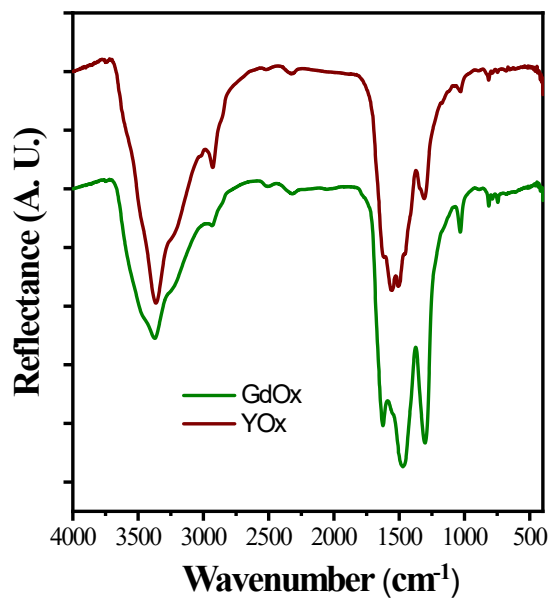

Fig. S3. FTIR spectra of GdOx/PVP-PMMA and YOx/PVP-PMMA hybrid films

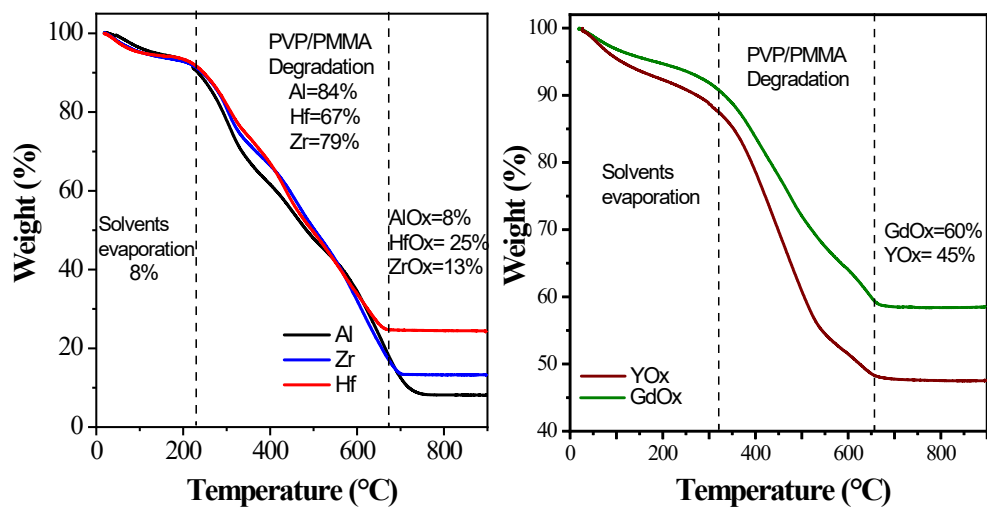

Fig. S4. TGA curves of hybrid dielectrics

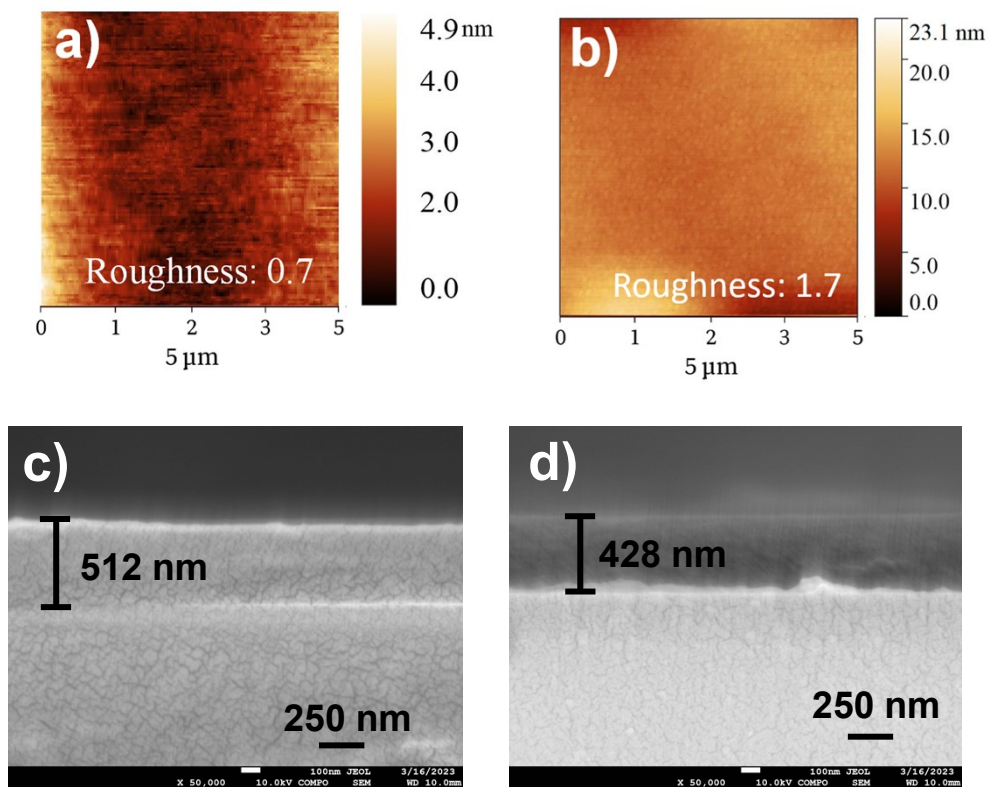

Fig. S5. AFM surface images of a) GdOx-PVP/PMMA, and b) YOx-PVP/PMMA hybrid dielectrics. Cross sectional SEM images of c) GdOx-PVP/PMMA, and d) YOx-PVP/PMMA

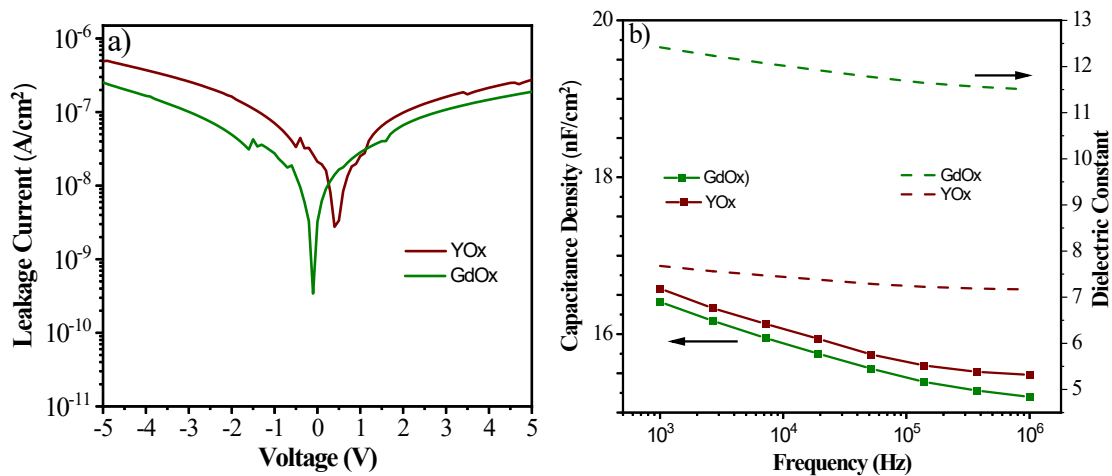

Fig. S6. a) Current density versus voltage and b) capacitance density and dielectric constant versus frequency characteristics of GdOx-PVP/PMMA and YOx-PVP/PMMA hybrid thin films.

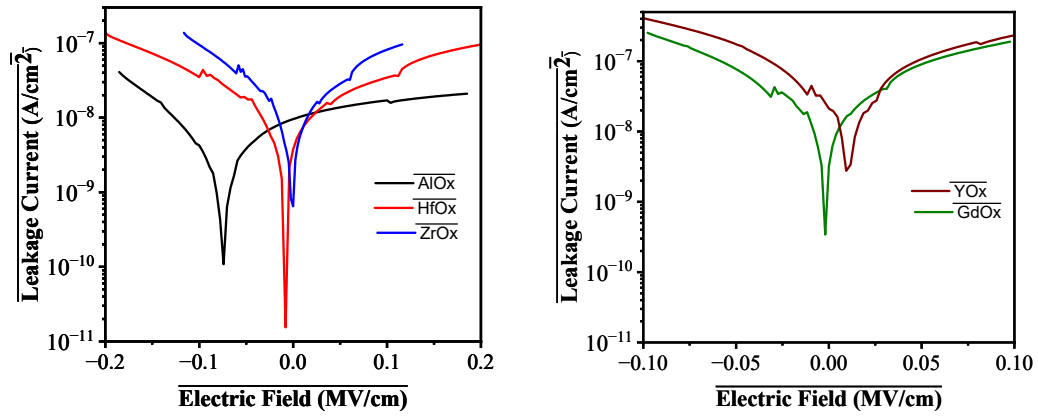

Fig. S7. a) Current density versus electric field of MOx-PVP/PMMA hybrid thin films.

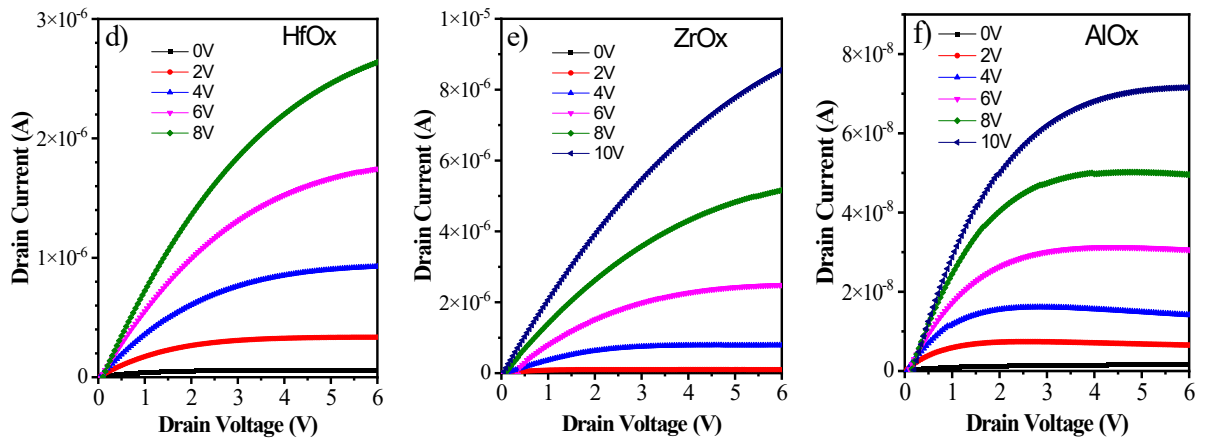

Fig. S8. Output curves of d) HfOx-PVP/PMMA, e) ZrOx-PVP/PMMA, and f) AlOx-PVP/PMMA gate dielectrics.

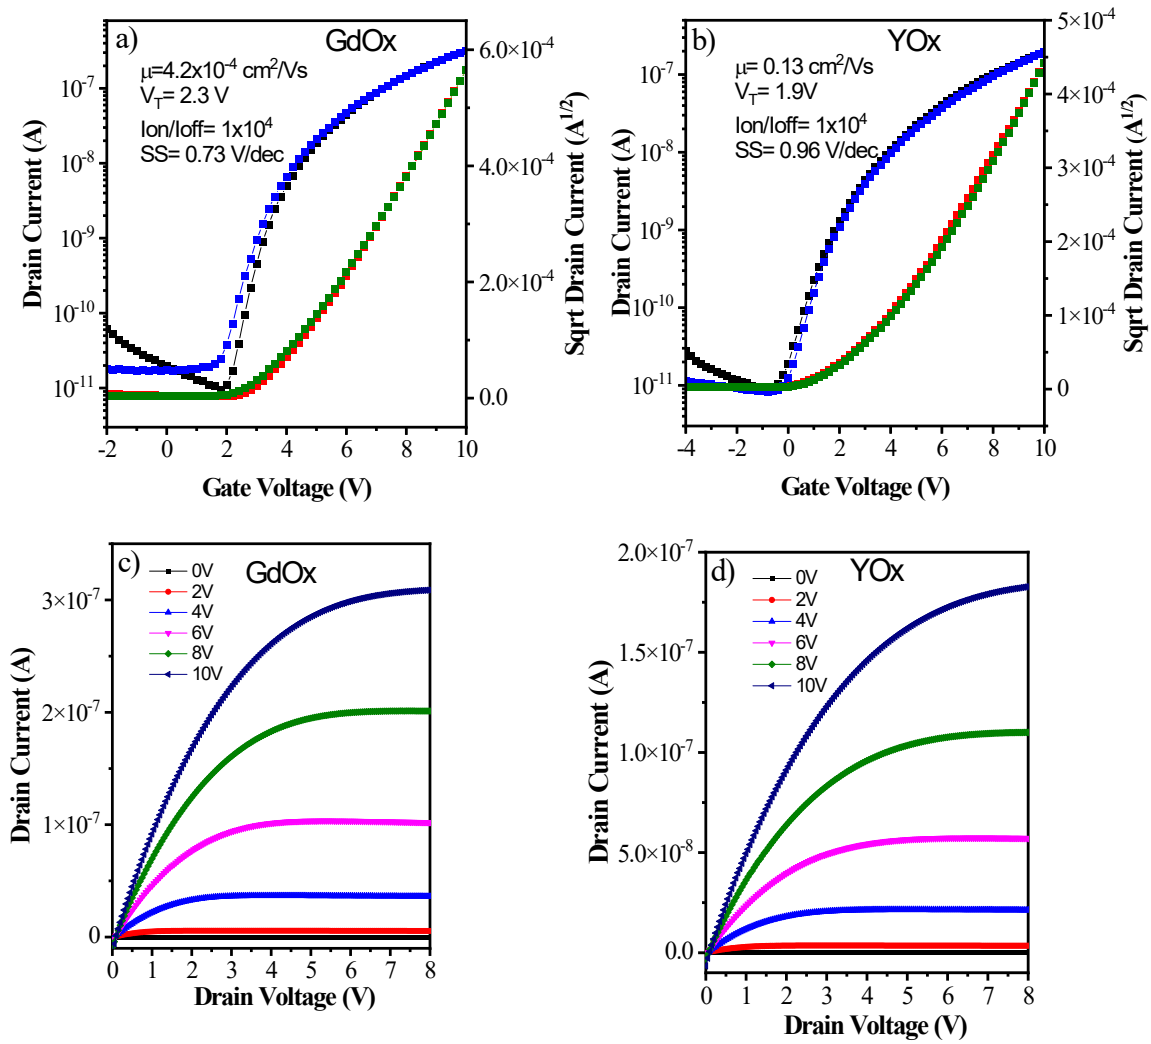

Fig. S9. Transfer curves of the  $\text{In}_2\text{O}_3$ -based TFTs with a) GdOx-PVP/PMMA, and b) YOx-PVP/PMMA gate dielectrics, and corresponding output curves of c) GdOx-PVP/PMMA, and d) YOx-PVP/PMMA gate dielectrics.

Table S2. Electrical performance parameter obtained for the  $\text{In}_2\text{O}_3$ -based TFT over rigid substrates.

| Sample | Mobility ( $\text{cm}^2/\text{Vs}$ ) | Threshold Voltage (V) | Subthreshold swing (V/dec) | $I_{\text{ON}}/I_{\text{OFF}}$ |
|--------|--------------------------------------|-----------------------|----------------------------|--------------------------------|
| GdOx   | $4.3 \times 10^{-4}$                 | 2.3                   | 0.73                       | $10^4$                         |
| YOx    | 0.13                                 | 1.9                   | 0.97                       | $10^4$                         |

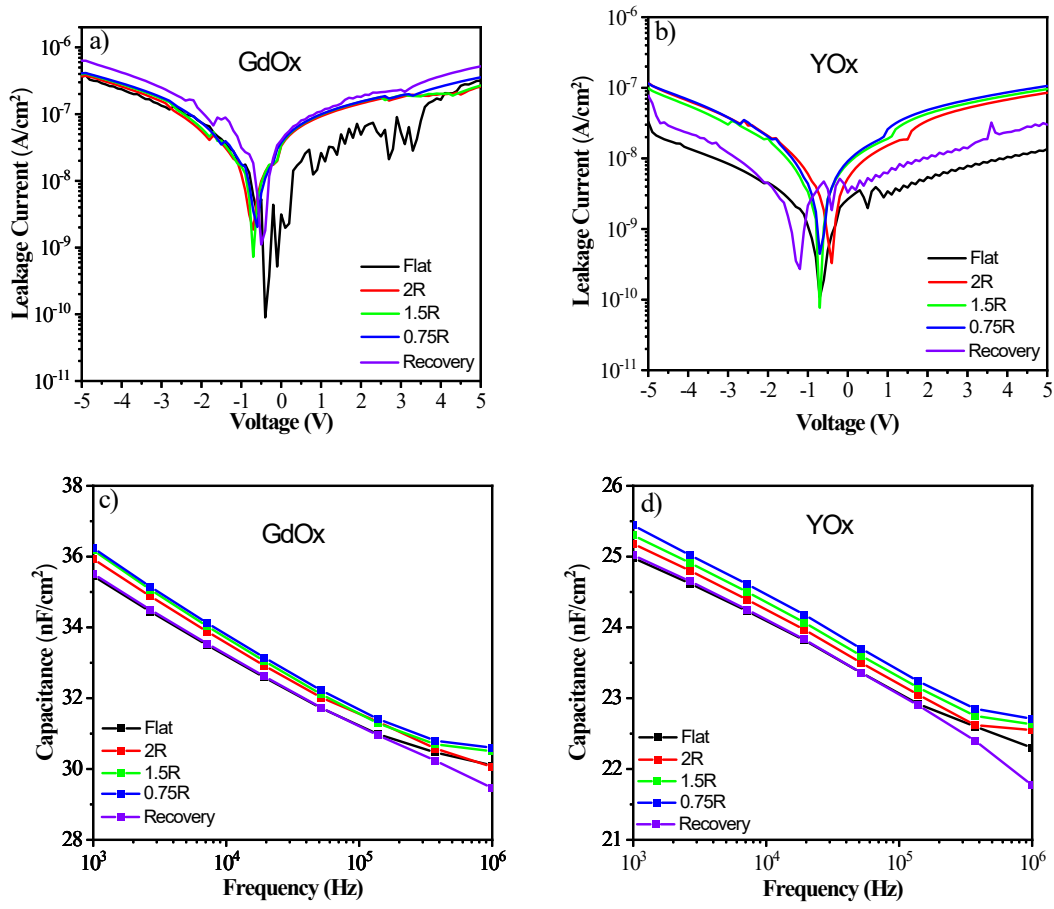

Fig. S10. Current density versus voltage measured at different bending radii on MIM structures fabricated on Al-coated PEN flexible substrate with a) GdOx-PVP/PMMA, and b) YOx-PVP/PMMA. Capacitance density versus frequency measured at different bending radii on the flexible MIM with c) GdOx-PVP/PMMA, and d) YOx-PVP/PMMA hybrid insulators.

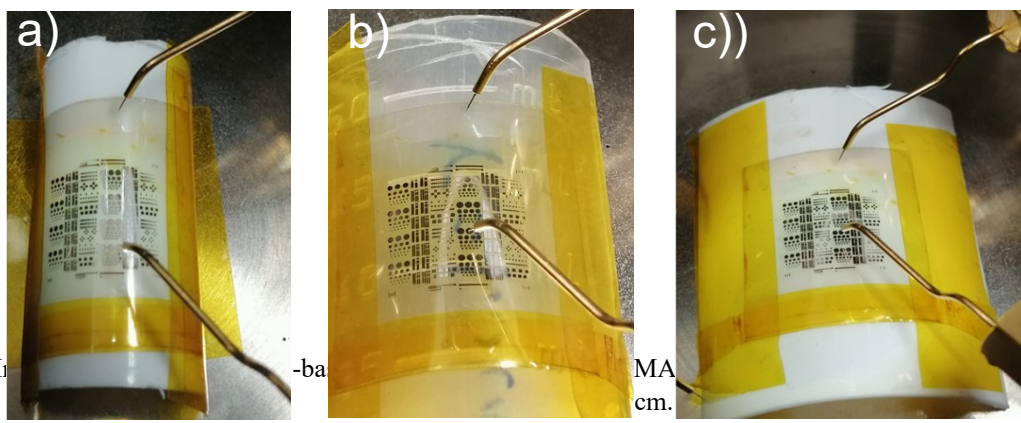

Fig. S11. Images of the MIM structures on a flexible substrate with different bending radii: a) 0.75 cm.

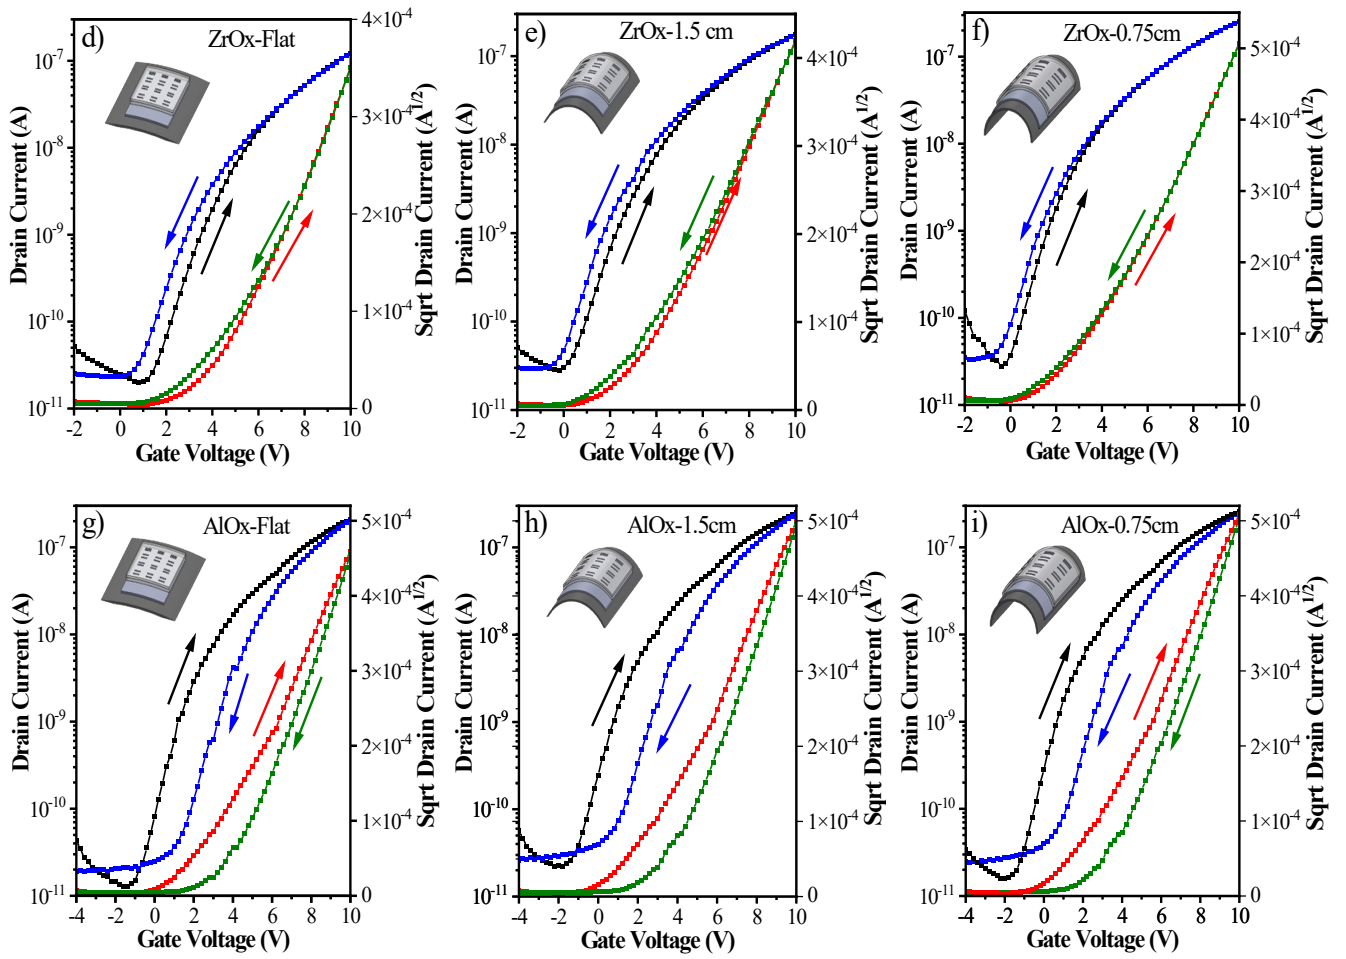

Fig. 12. Transfer curves (left axis) and Sqrt Drain Current versus Gate Voltage (right axis) of the In<sub>2</sub>O<sub>3</sub>-based TFTs with ZrOx-PVP/PMMA and AlOx-PVP/PMMA gate dielectrics, measured at different bending radii: a) and d) without bending, b), and e) 1.5 cm, and c) and f) 0.75 cm, respectively.

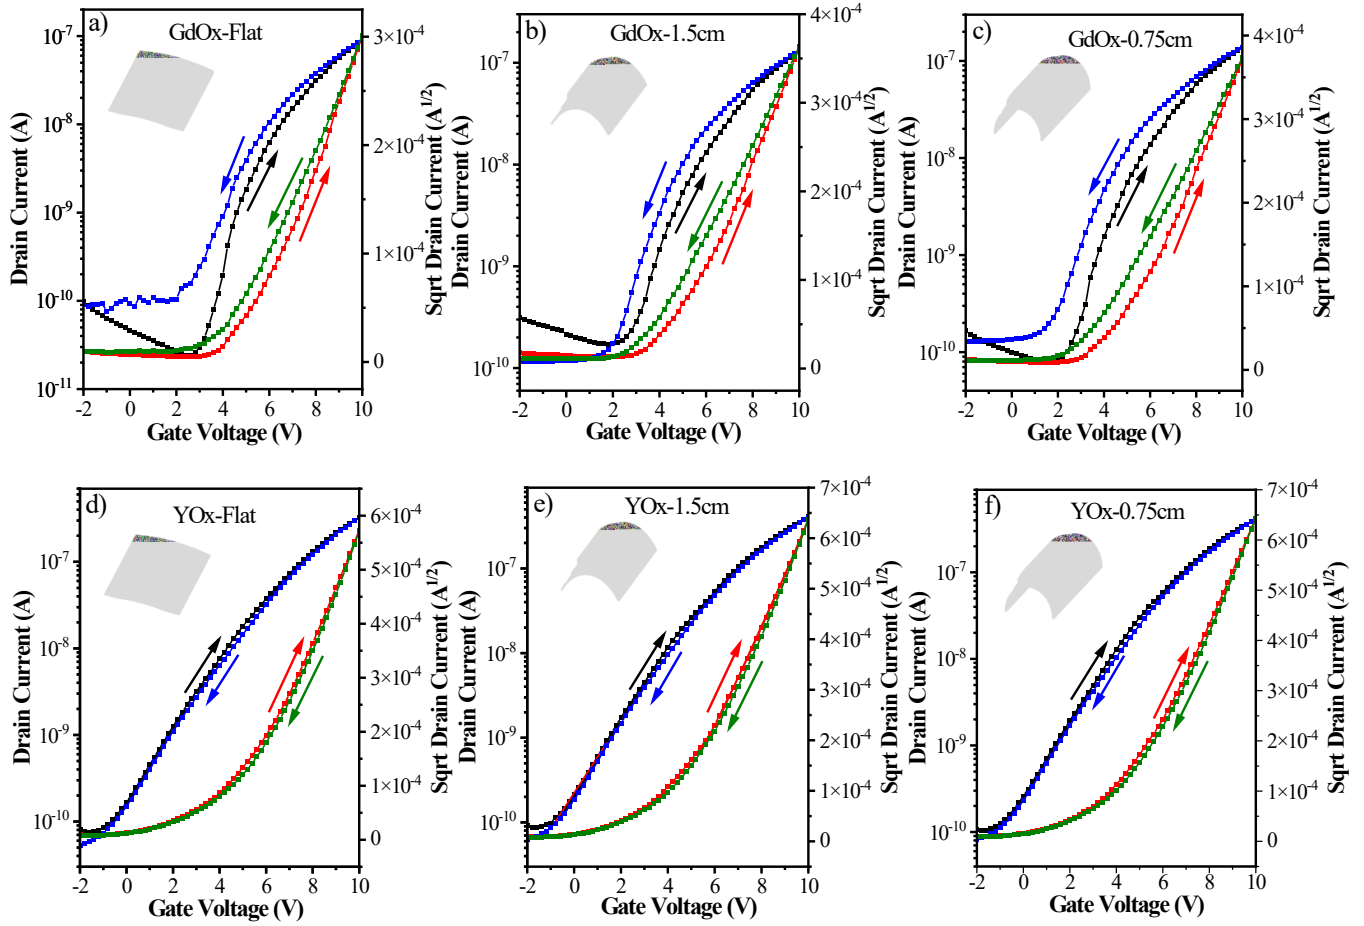

Fig. S13. Transfer curves (left axis) and Sqrt Drain Current versus Gate Voltage (right axis) of the  $\text{In}_2\text{O}_3$ -based TFTs with GdOx-PVP/PMMA, and YOx-PVP/PMMA gate dielectrics, measured at different bending radii: a), and d) without bending, and b), and e) 1.5 cm, and c), and f) 0.75 cm, respectively.

Table S3. Parameters obtained for the  $\text{In}_2\text{O}_3$ -based TFT over flexible substrates under bending conditions.

| Sample        | Bending Radii (cm) | Mobility ( $\text{cm}^2/\text{Vs}$ ) | $V_T$ (V) | SS (V/dec) | $I_{ON}/I_{OFF}$ |
|---------------|--------------------|--------------------------------------|-----------|------------|------------------|
| GdOx-PVP/PMMA | Flat               | 1.06E-02                             | 4.6       | 1.01       | 4.00E+03         |
|               | 2R                 | 1.18E-02                             | 4.04      | 1.35       | 1.92E+03         |
|               | 1.5R               | 1.77E-02                             | 3.98      | 1.54       | 7.38E+02         |
|               | 0.75R              | 1.86E-02                             | 3.98      | 1.37       | 1.60E+03         |
|               | Recover            | 2.95E-03                             | 4.6       | 1.18       | 2.98E+03         |
| YOx-PVP/PMMA  | Flat               | 6.48E-02                             | 4.1       | 2.56       | 4.13E+03         |
|               | 2R                 | 6.98E-02                             | 3.9       | 2.50       | 5.85E+03         |
|               | 1.5R               | 7.08E-02                             | 3.9       | 2.38       | 4.53E+03         |
|               | 0.75R              | 7.05E-02                             | 3.7       | 2.50       | 3.90E+03         |
|               | Recover            | 7.06E-03                             | 4.0       | 2.13       | 6.60E+03         |
